# Supplementary material
Source: PubMed Central journal article supplement (PMC4761834)
Supplement: Supp_Fig1.pdf [file Supp_Fig1.pdf]

## Supplementary Data

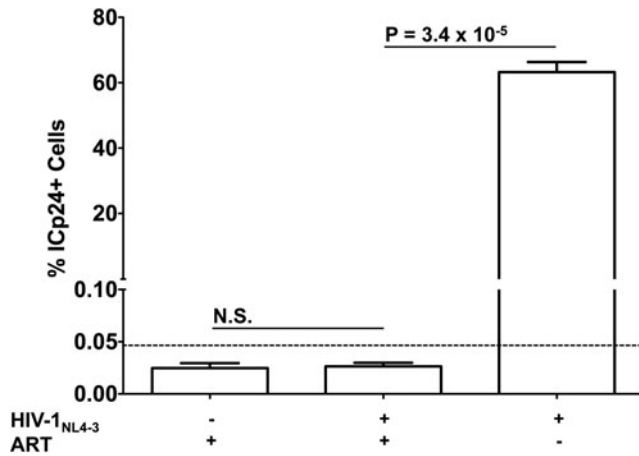

**SUPPLEMENTARY FIG. S1.** Cultured T<sub>CM</sub> cells from a representative donor (from 13 tested) were latently infected with HIV-1<sub>NL4-3</sub>. On day 17, culture supernatants from HIV-1<sub>NL4-3</sub>-infected (or uninfected control) cells at day 17 were isolated and incubated with fresh MT2 cells, cultured for 48 h, and then evaluated for intracellular p24 (ICp24) by flow cytometry. Significance was calculated using a two-tailed paired *t*-test analysis (*p* value provided). Supernatants from primary cell cultures containing ART did not result in intracellular ICp24 levels that were higher than background detection levels (<0.05% ICp24<sup>+</sup> cells) from uninfected cell supernatants. In contrast, culture supernatants from ART-negative cultures resulted in very high levels (63%) of intracellular ICp24<sup>+</sup> MT2 cells. We, therefore, conclude that concentrations of ART in our cultures are sufficient to block additional infections.
