# Supplementary material
Source: PubMed Central journal article supplement (PMC4761834)
Supplement: Supp_Fig2.pdf [file Supp_Fig2.pdf]

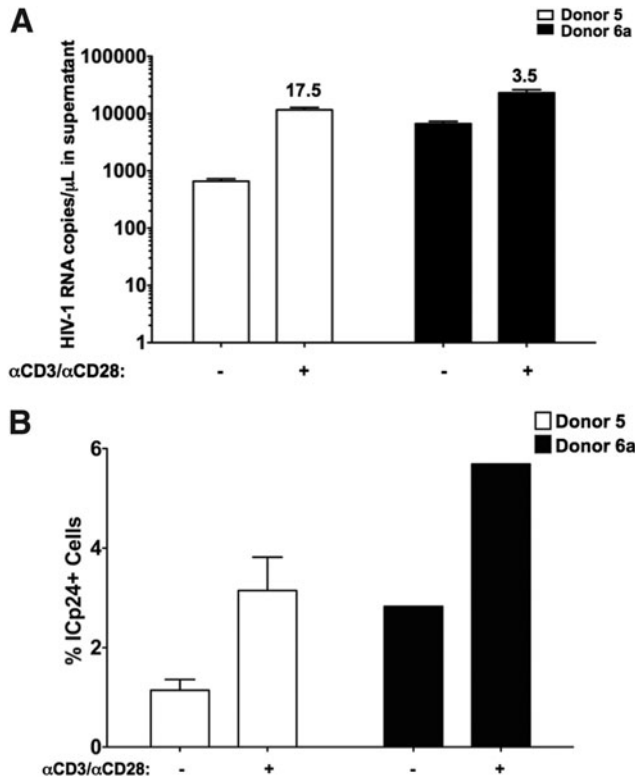

**SUPPLEMENTARY FIG. S2.** Cultured  $T_{CM}$  cells from two blood donors were latently infected with HIV-1<sub>NL-43</sub>. On day 17, cells were treated with IL-2 alone or with IL-2 +  $\alpha$ CD3/ $\alpha$ CD28 as indicated. **(A)** After 48 h, HIV-1 RNA from culture supernatants was measured. After 48 h treatment, ICp24 **(B)** was measured using flow cytometry. Numbers in **(A)** represent fold induction compared to no treatment control.
