# Supplementary material
Source: PubMed Central journal article supplement (PMC4761834)
Supplement: Supp_Fig3.pdf [file Supp_Fig3.pdf]

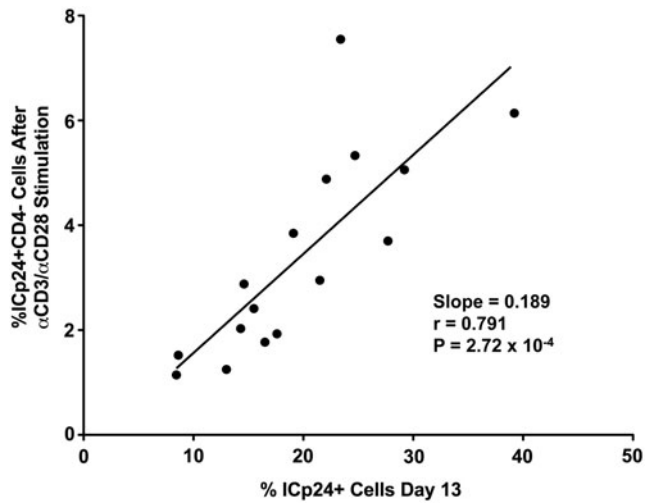

**SUPPLEMENTARY FIG. S3.** Sixteen separate samples of cultured  $T_{CM}$  cells from 10 blood donors were latently infected with HIV-1<sub>NL-43</sub>. On day 13 ICp24 was measured using flow cytometry. On day 19, ICp24 and CD4 were measured by flow cytometry. A linear regression was performed. Slope, Pearson's correlation, and two-tailed  $p$  values are shown.
