# Supplementary material
Source: PubMed Central journal article supplement (PMC4761834)
Supplement: Supp_Fig4.pdf [file Supp_Fig4.pdf]

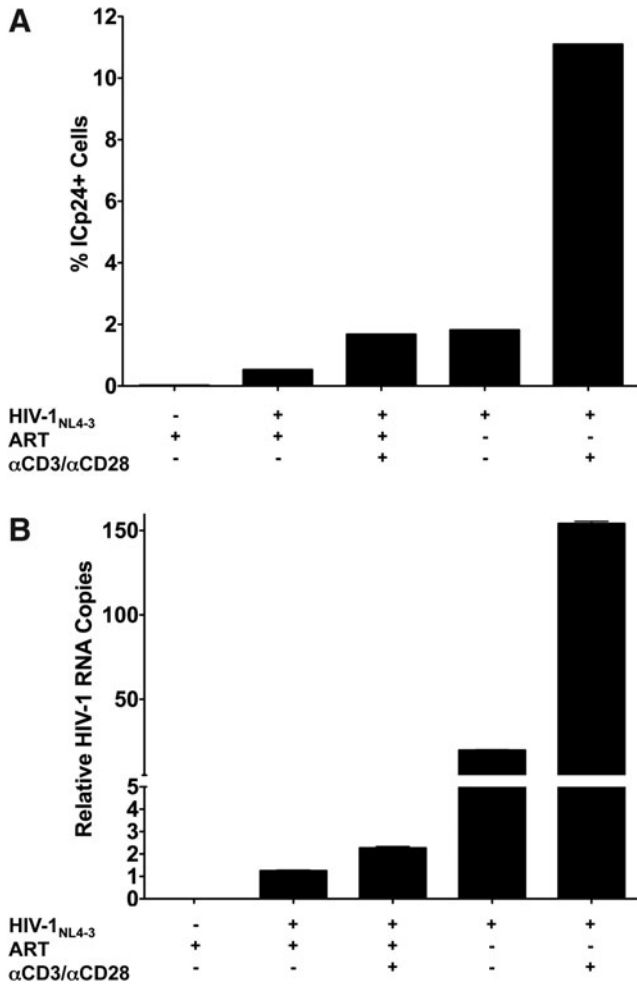

**SUPPLEMENTARY FIG. S4.** Cultured T<sub>CM</sub> cells from a single blood donor were latently infected with HIV-1<sub>NL-43</sub> with the exception that one sample was cultured in the absence of ART (1 μM nelfinavir). On day 17, cells were treated with IL-2 alone or with IL-2 + αCD3/αCD28 as indicated. **(A)** After 48 h, ICp24 was measured using flow cytometry. **(B)** After 48 h treatment, cell-associated HIV-1 RNA was measured.
